# Supplementary material for: Influence of polymeric electrets on the performance of derived hybrid perovskite-based photo-memory devices
Source: Royal Society of Chemistry journal article supplement (doi:10.1039/c8nr06396f), 2018-01-01
Supplement: c8nr06396f1.pdf [file c8nr06396f1.pdf]

## Supporting information for

### **Influence of Polymeric Electrets on the Performance of Derived Hybrid Perovskite-Based Photo-memory Devices**

Ender Ercan,<sup>a</sup> Jung-Yao Chen,<sup>a</sup> Chien-Chung Shih,<sup>a</sup> Chu-Chen Chueh,<sup>\*a,b</sup> and Wen-Chang Chen,<sup>\*a,b</sup>

<sup>a</sup> Department of Chemical Engineering, National Taiwan University,  
Taipei 10617, Taiwan

<sup>b</sup> Advanced Research Center for Green Materials Science & Technology,  
National Taiwan University, Taipei, 10617, Taiwan

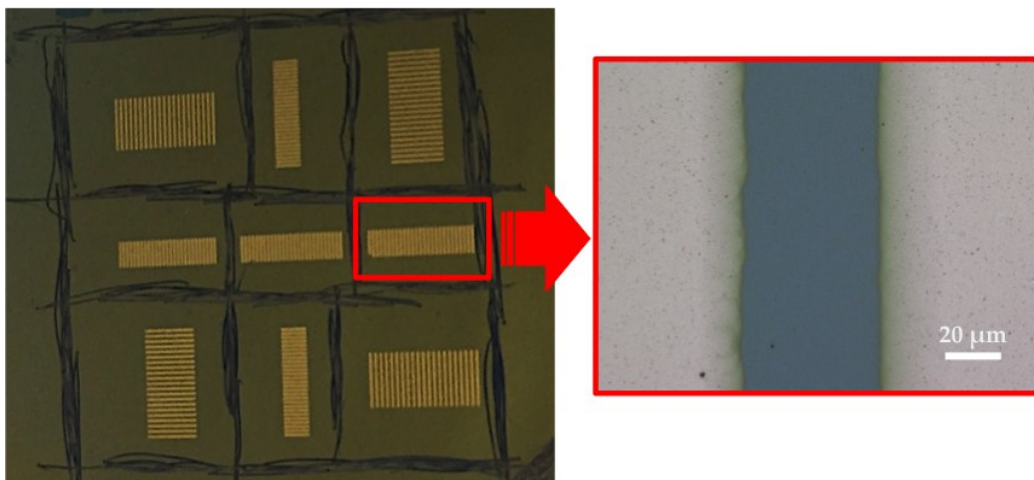

**Figure S1.** Optical image of the device using perovskite/PMAA as the gate dielectric. (Each pixel area was preserved by scratching as revealed.)

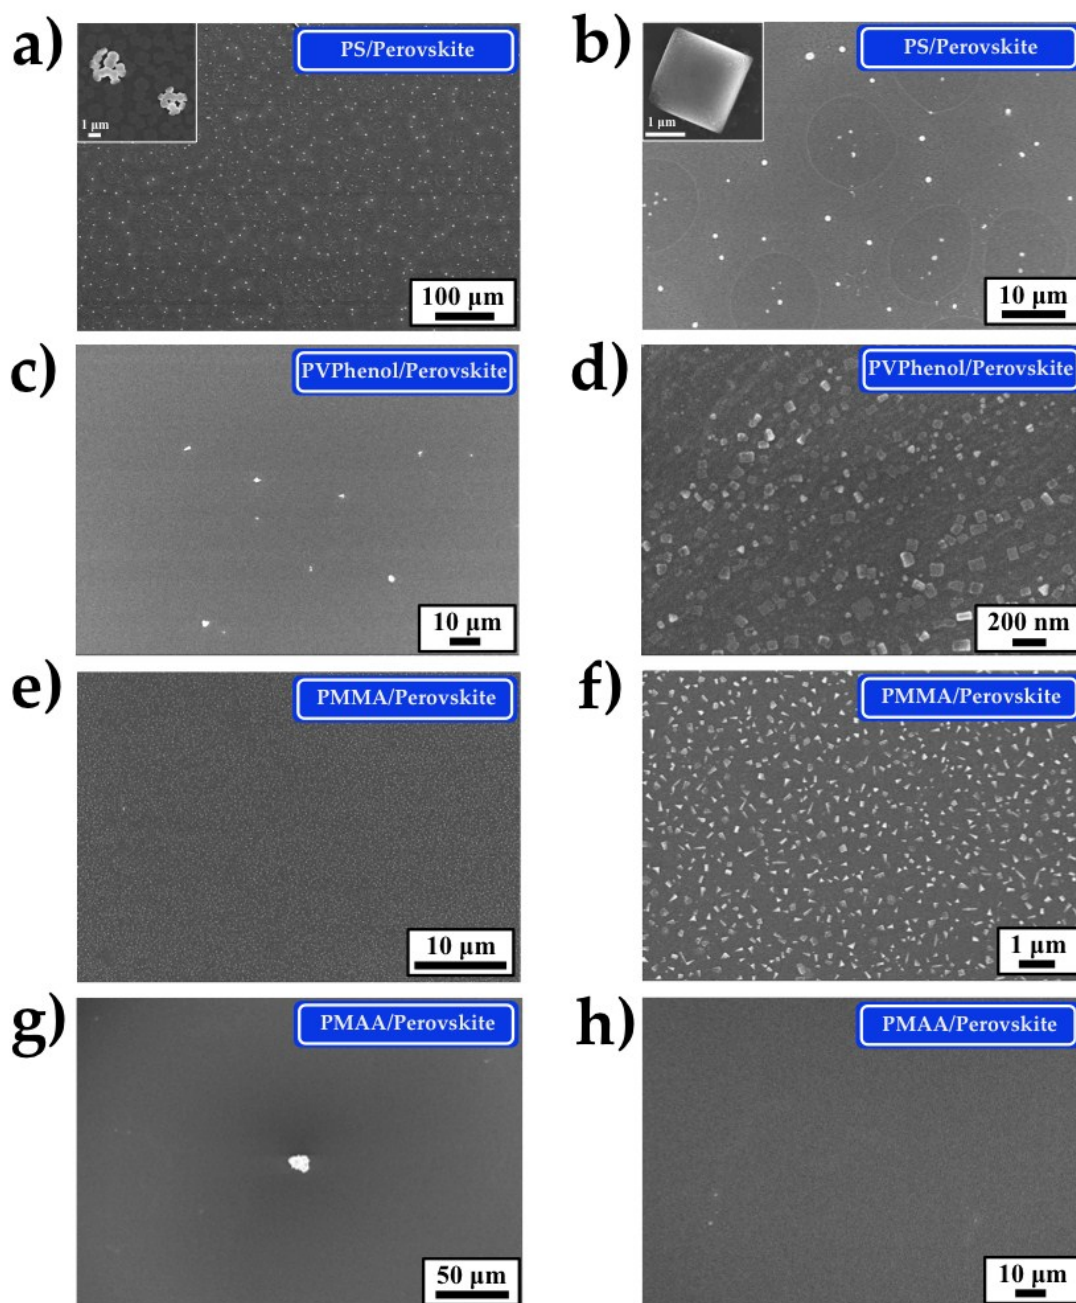

**Figure S2.** The surface SEM images of the polymer/perovskite blends based on a-b) PS, c-d) PVPh, e-f) PMMA, and g-h) PMAA.

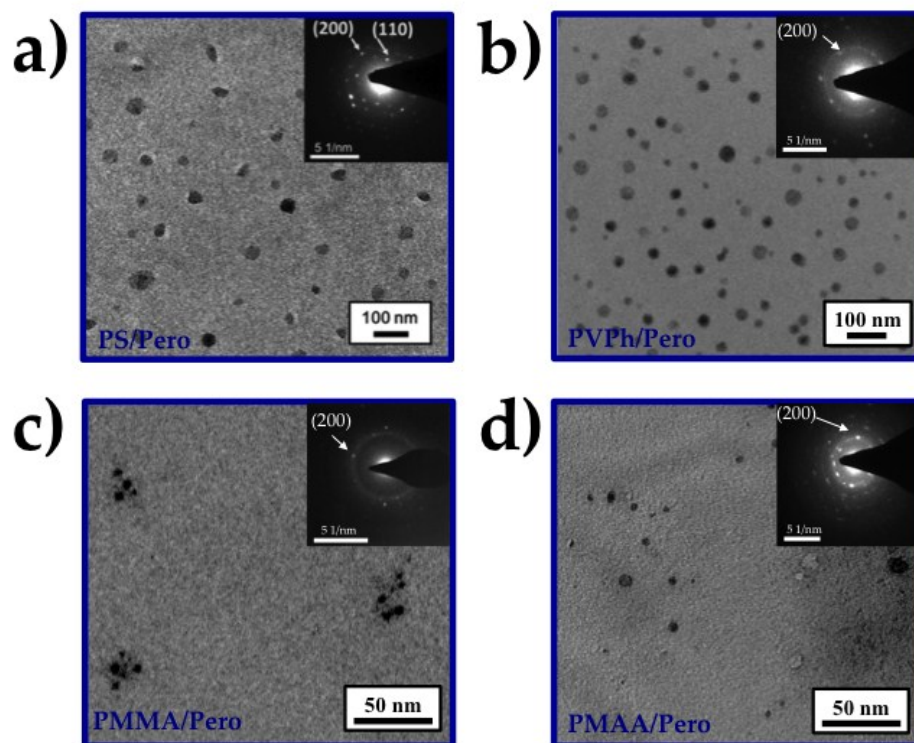

**Figure S3.** The transmission electron microscope (TEM) images of the polymer/perovskite blends based on a) PS (result shown in our previous work),<sup>[1]</sup> b) PVPh, c) PMMA, and d) PMAA with an inset of SAED.

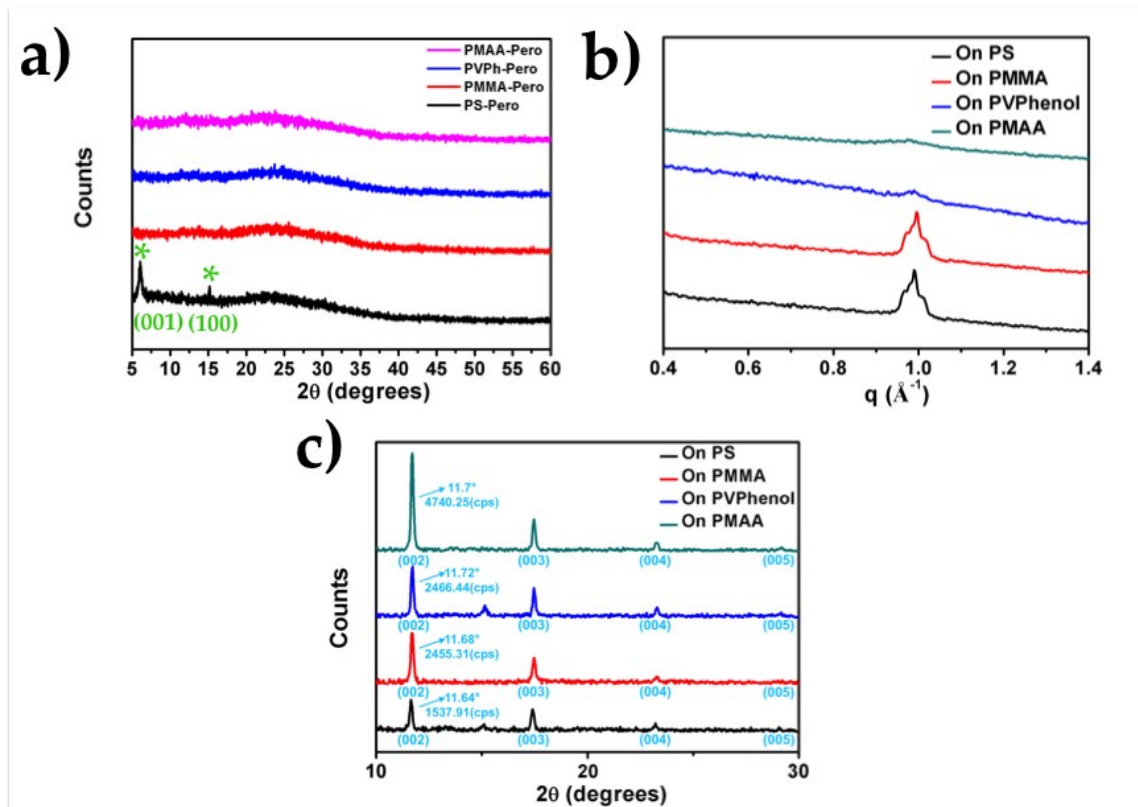

**Figure S4.** a) XRD (X-ray diffraction /  $\theta$ - $2\theta$  mode) peaks of the perovskite particles. b) Profile of first peak ((100) plane) for GIXD patterns of the polymer/perovskite blends. c) XRD pattern of the pentacene grains grown on different hybrid layers.

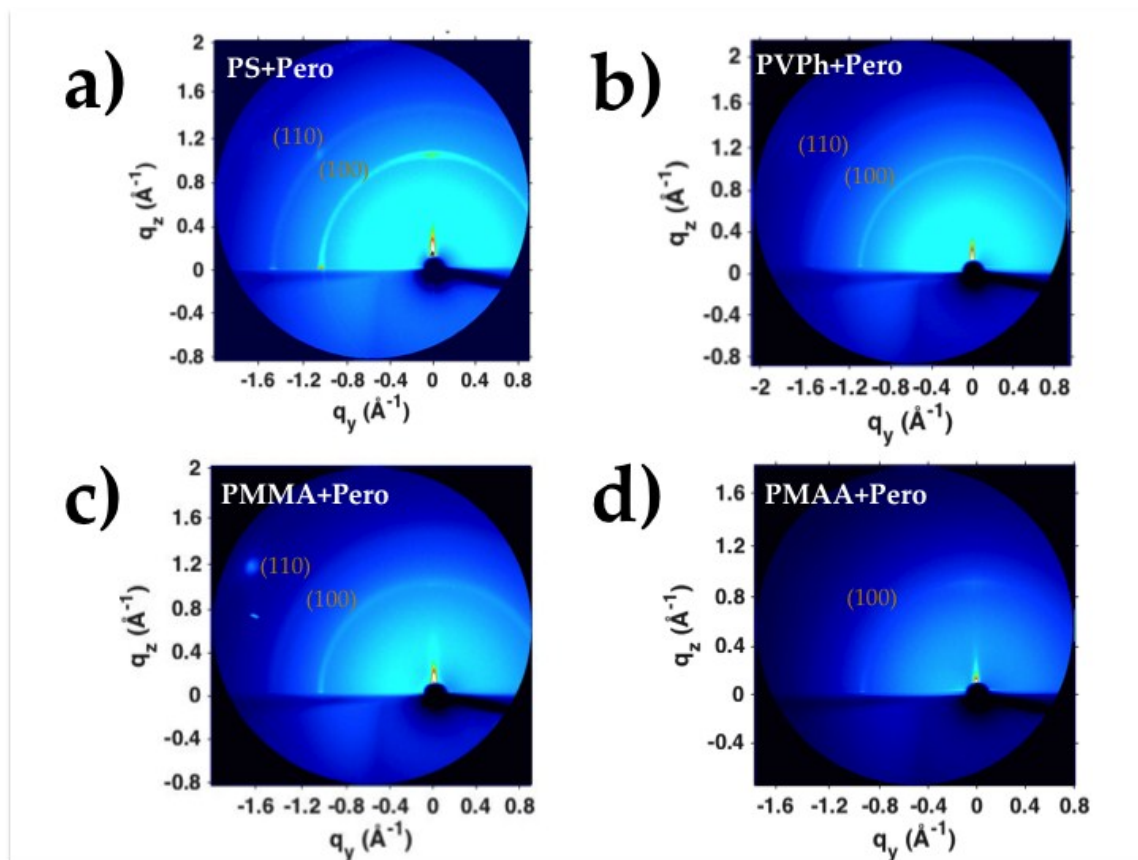

**Figure S5.** Grazing Incident X-ray Diffraction (GIXD) patterns of the polymer/perovskite blends based on a) PS, b) PVPh, c) PMMA, and d) PMAA.

**Table S1.** Volume averaged grain size and crystallite size of the pentacene grains and perovskite nanoparticles calculated using Scherrer's equation.

| Sample                                                                            | Crystallite size | Sample                                      | Crystallite size |
|-----------------------------------------------------------------------------------|------------------|---------------------------------------------|------------------|
| Polymer / Single-halide perovskite (MAPbBr <sub>3</sub> ) (weight ratio of 2 / 1) |                  |                                             |                  |
| <b>Perovskite</b> crystallite size in PS                                          | 25.76            | <b>Pentacene</b> on PS - Perovkite layer    | 61.52            |
| <b>Perovskite</b> crystallite size in PVPh                                        | 24.0             | <b>Pentacene</b> on PVPh - Perovskite layer | 57.01            |
| <b>Perovskite</b> crystallite size in PMMA                                        | 17.5             | <b>Pentacene</b> on PMMA - Pero layer       | 63.53            |
| <b>Perovskite</b> crystallite size in PMAA                                        | 8.29             | <b>Pentacene</b> on PMAA - Pero layer       | 67.79            |

Volume averaged grain size  $D$   
(size of crystallite)

Scherrer's Equation

$$D = \frac{K \lambda}{FWHM \cos\theta}$$

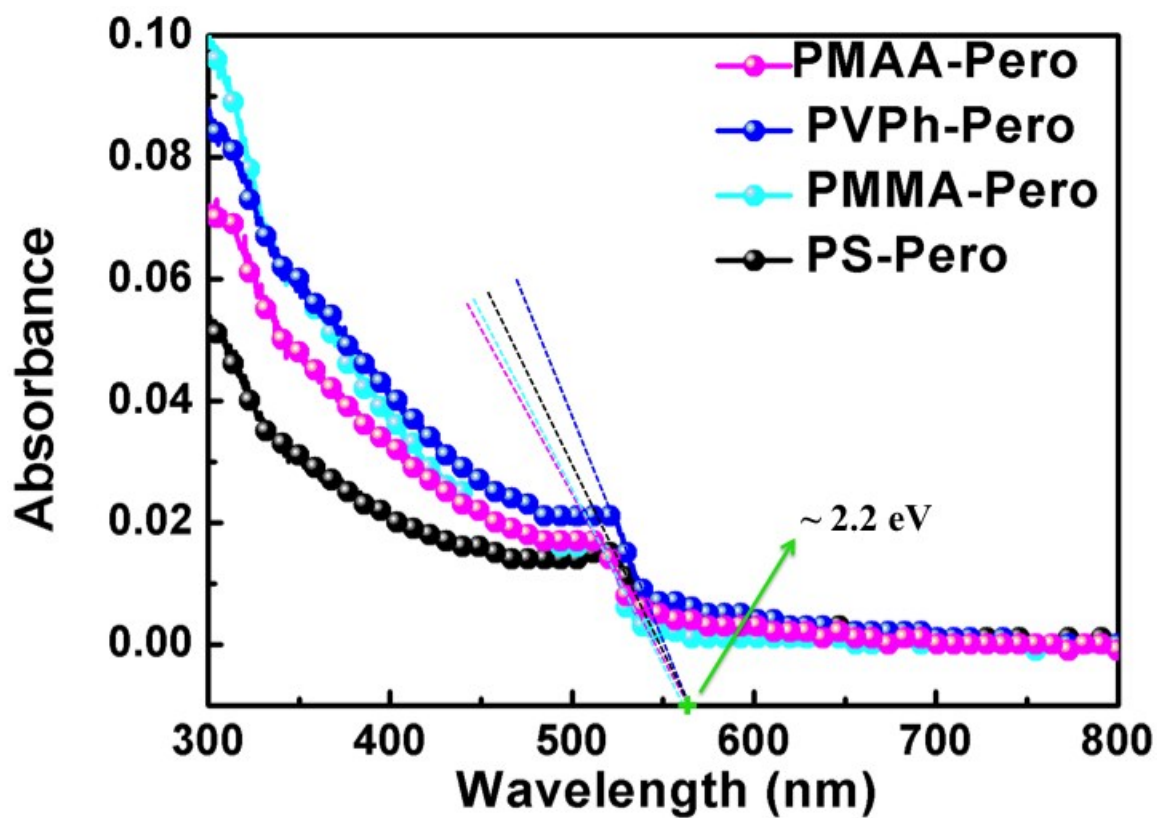

**Figure S6.** UV-vis spectra of the polymer/perovskite blends, wherein the onset of the absorption edge is indicated.



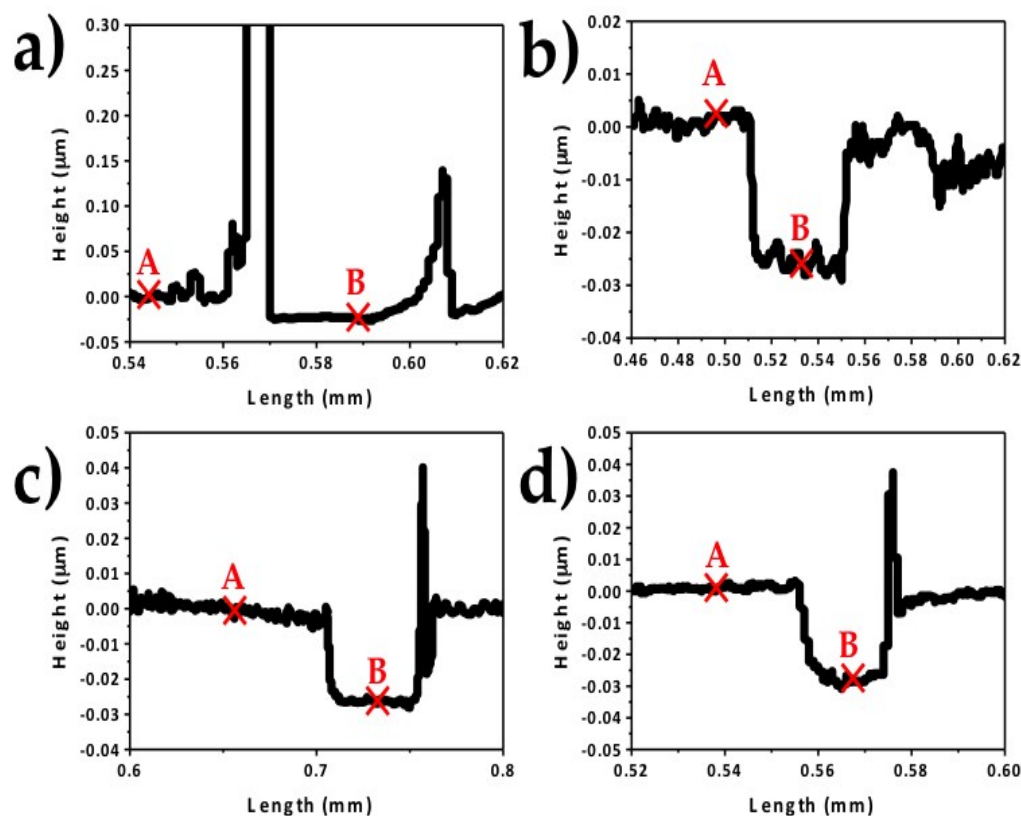

**Figure S7.** Surface profiles of the spin-coated perovskite/polymer films. (A and B represent the maximum and minimum thickness (after scratch), respectively.)

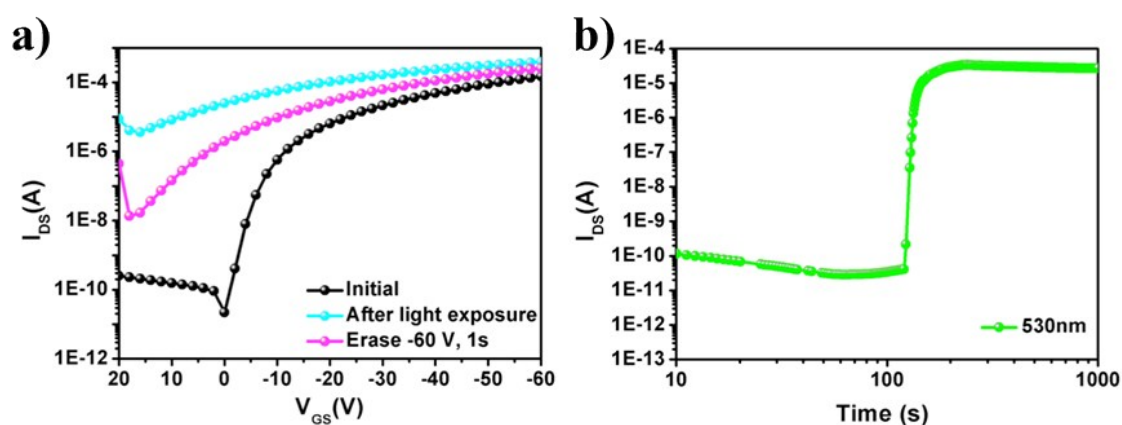

**Figure S8.** (a) Transfer curve of the perovskite/PMAA-based photo-memory device at  $V_{DS} = -60$  V, wherein the light exposure is under 530-nm green light for 120 s. (b) Temporal IDS curves of the perovskite/PMAA-based photo-memory device at  $V_{DS} = -5$  V with light programming for 120 s at 530 nm.

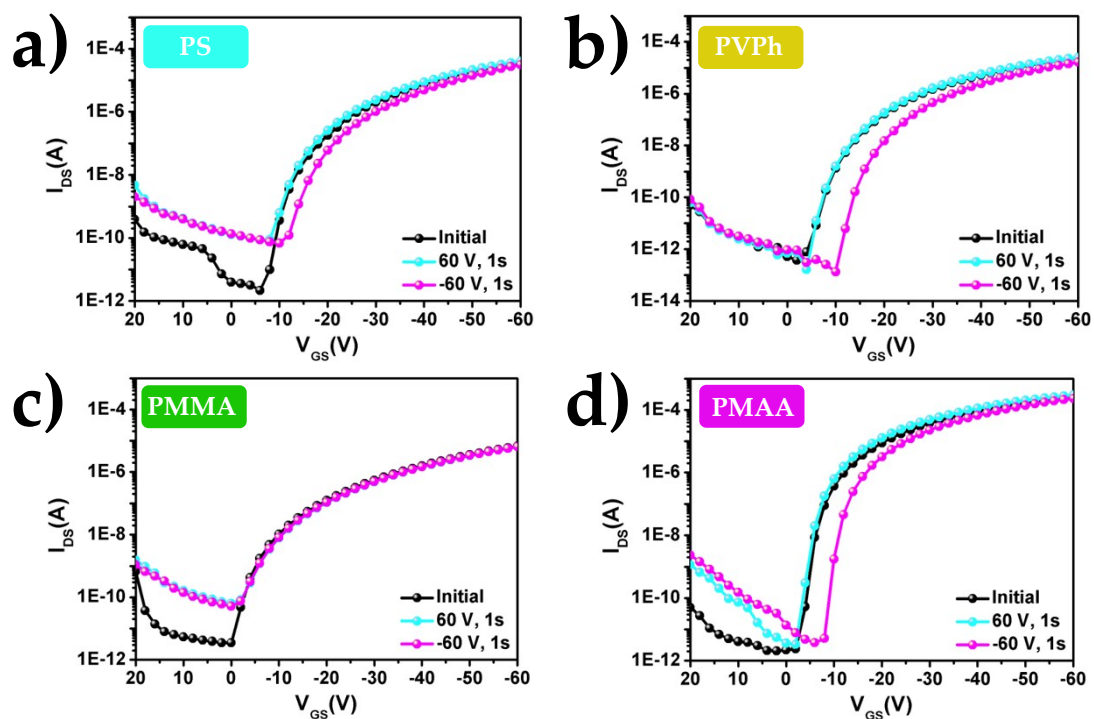

**Figure S9.** Transfer characteristics of the photo-memory devices using neat polymer as the charge-trapping layer: a) PS, b) PVPh, c) PMMA, and d) PMAA.

**Table S2.** Photo-memory properties of the studied hybrid perovskite-based photomemory devices using different polymer matrix in the charge-trapping layer.

| Sample                                                                            | $V_{TH}$ (V)     |                  | $I_{ON}/I_{OFF}$<br>( $\times 10^3$ ) | $\mu_{max}$ ( $\times 10^{-2}$ )<br>( $cm^2/V^3 s$ ) |
|-----------------------------------------------------------------------------------|------------------|------------------|---------------------------------------|------------------------------------------------------|
|                                                                                   | Initial          | After light      |                                       |                                                      |
| Polymer / Single-halide perovskite (MAPbBr <sub>3</sub> ) (weight ratio of 2 / 1) |                  |                  |                                       |                                                      |
| PS - Pero                                                                         | $-19.5 \pm 2.27$ | $-11.3 \pm 2.25$ | 1.19                                  | $1.23 \pm 0.14$                                      |
| PVPh - Pero                                                                       | $-20.8 \pm 2.02$ | $10.7 \pm 2.73$  | 112.2                                 | $1.77 \pm 0.06$                                      |
| PMMA - Pero                                                                       | $-18.8 \pm 3.14$ | $22.3 \pm 3.47$  | 258.8                                 | $5.51 \pm 0.22$                                      |
| PMAA - Pero                                                                       | $-18.4 \pm 3.28$ | $21.1 \pm 3.88$  | 582.3                                 | $2.53 \pm 0.07$                                      |

**Table S2:** Light illumination time is 120s for writing process and voltage application for which -60 V gate biases was applied during erasing processes. Applied light source was a 450 nm blue light emitting laser pen with intensity of  $71 \text{ mW cm}^{-2}$ .  $I_{ON}$  and  $I_{OFF}$  are assigned as the current levels from the transfer curves before and after light irradiation at a reading gate voltage of 0V.

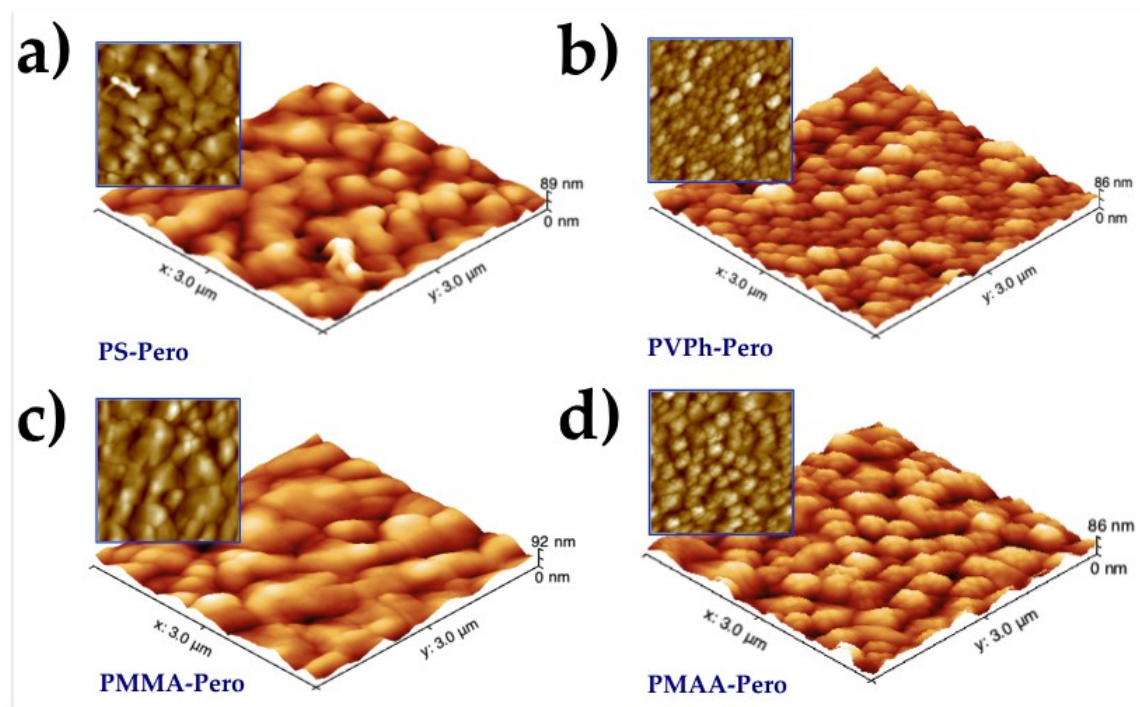

**Figure S10.** The AFM images of the pentacene film growth on the polymer/perovskite blends based on a) PS, b) PVPh, c) PMMA, and d) PMAA.

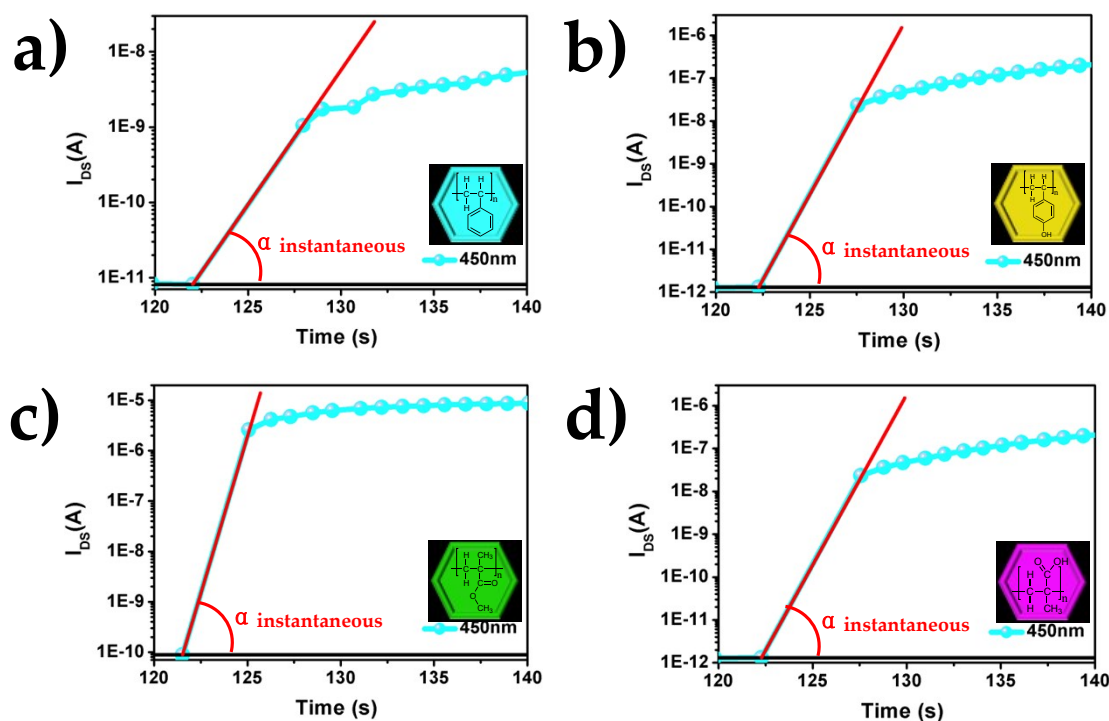

**Figure S11.** Enlarged temporal  $I_{DS}$  curves, which indicates the slope of the first instantaneous jump at the transition, at  $V_{DS} = -60$  V with light programming (450 nm,  $71 \text{ mW cm}^{-2}$  for 120 s): a) PS, b) PVPh, c) PMMA, and d) PMAA.

## Notes and references

- 1 J.-Y. Chen, Y.-C. Chiu, Y.-T. Li, C.-C. Chueh, W.-C. Chen, *Adv. Mater.*, 2017, 29, 1702217.
